# Supplementary material
Source: PubMed Central journal article supplement (PMC6774200)
Supplement: NIHMS1530778-supplement-supplemental.pdf [file NIHMS1530778-supplement-supplemental.pdf]

**Title:** Evidence for Cortisol-Cortisone Metabolism by Marine Mammal Blubber

**Authors:** Thomas M. Galligan<sup>1,2\*</sup>, Lori H. Schwacke<sup>3</sup>, Wayne E. McFee<sup>4</sup>, Ashley S.P. Boggs<sup>5</sup>

**Supplemental Materials**

**Supplemental Table 1.** Average internal standard masses

| <b>Compound</b>                         | <b>Average Mass (ng)</b> |
|-----------------------------------------|--------------------------|
| Cortisol- <i>d</i> <sub>4</sub>         | 17.694                   |
| Cortisone- <sup>13</sup> C <sub>3</sub> | 17.007                   |

**Supplemental Table 2.** Calibration curve parameters and reporting limits (RLs). Observed reporting limit (RL<sub>obs</sub>) is defined as the lowest calibration standard used in the calculation of the standard curve. Calculated reporting (RL<sub>calc</sub>) are calculated as three times the standard deviation of the NHC measurements plus the mean of NHC measurements

| Hormone   | Range (ng)                       | Number of Points | Curve  | Intercept | Slope  | R <sup>2</sup> | RL <sub>obs</sub> (ng) | RL <sub>calc</sub> (ng) |
|-----------|----------------------------------|------------------|--------|-----------|--------|----------------|------------------------|-------------------------|
| Cortisol  | 0.05269 - 7.879•10 <sup>-5</sup> | 3                | Linear | 0.0007    | 1.9757 | 0.9999         | 7.879•10 <sup>-5</sup> | -                       |
| Cortisone | 1.185 - 0.05455                  | 4                | Linear | -0.0037   | 3.7352 | 0.9995         | 0.05455                | 0.02107                 |

- = negative value
